# Supplementary material for: Community Treatment Centers for Isolation of Asymptomatic and Mildly Symptomatic Patients with Coronavirus Disease, South Korea
Source: PubMed Central journal article supplement (PMC7510708; doi:10.3201/eid2610.201539), 2020-10
Supplement: 20-1539-Techapp-s1.pdf [file 20-1539-Techapp-s1.pdf]

# Community Treatment Centers for Isolation of Asymptomatic and Mildly Symptomatic Patients with Coronavirus Disease, South Korea

## Appendix

### Questionnaire for Basic Medical Information

#### A. Gimje Center

1. Name: \_\_\_\_\_
2. Location
  - Building B
  - Building C
3. Room number:
4. Did you have following symptoms?
  - No symptom
  - Fever ( $\geq 37.5^{\circ}\text{C}$ )
  - Coughing
  - Muscle pain
  - Runny nose or stuffy nose
  - Sore throat
  - Dyspnea
  - Feebleness (Malaise)
  - Diarrhea
  - Abdominal pain
  - Others (\_\_\_\_\_)
5. What is the date of initial symptom expression? (If you don't have any symptoms, please skip this question)  
\_\_\_/\_\_\_/\_\_\_ (Day/Month/Year)
6. What is the date of diagnosis of COVID-19  
\_\_\_/\_\_\_/\_\_\_ (Day/Month/Year)

7. Underlying conditions (Please check all the disease you have.)

- Hypertension
- Diabetes mellitus
- Chronic Renal disease
- Chronic liver disease
- Chronic pulmonary disease
- Chronic cardiovascular disease (except hypertension)
- Hematologic malignancy
- Undergoing chemotherapy
- Use of immunosuppressants
- HIV
- Others (\_\_\_\_\_)

8. Any of following?

- Obesity
- Pregnant
- Transplantation recipient
- Others (\_\_\_\_\_)
- Not applicable

B. Gyeongju Center

1. Name: \_\_\_\_\_

2. Sex

- Male
- Female

3. Date of birth: \_\_\_/\_\_\_/\_\_\_ (Day/Month/Year)

4. What is the date of initial symptom expression? (If you don't have any symptoms, please skip this question)

\_\_\_/\_\_\_/\_\_\_ (Day/Month/Year)

5. Underlying conditions: \_\_\_\_\_

6. Are you pregnant?

- Yes
- No

7. Did you have following symptoms

- Fever ( $\geq 37.5^{\circ}\text{C}$ )
- Coughing
- Muscle pain
- Runny nose or stuffy nose
- Sore throat
- Dyspnea
- Febleness (Malaise)
- Diarrhea
- Abdominal pain
- Others (\_\_\_\_\_)

8. Has the medication been taken in the last 24 hours?

- Yes (\_\_\_\_\_)
- No

9. Others: \_\_\_\_\_

C. Jecheon Center

1. Name: \_\_\_\_\_
2. Sex
  - Male
  - Female
3. Date of birth: \_\_\_\_/\_\_\_\_/\_\_\_\_ (Day/Month/Year)
4. Location
  - Building B
  - Building C
5. Room number: \_\_\_\_\_
6. Mobile phone number: \_\_\_\_\_
7. Mobile phone number of guardians: \_\_\_\_\_
8. Underlying disease (Please check all the disease you have.)
  - Hypertension
  - Diabetes mellitus
  - Renal disease
  - Others (\_\_\_\_\_)
  - None
9. Do you have sufficient medication more than 1 month?
  - Yes (Sufficient)
  - No (Not sufficient)
  - Irrelevant
10. If you don't have sufficient medication, do you have supplement plan?
  - I have family member who can deliver medication
  - I need someone to help purchase medication for me
  - Irrelevant
11. Are you pregnant now?
  - No
  - Yes
  - Irrelevant
  - Others (\_\_\_\_\_)
12. Clinical symptoms (Please check all the symptoms you have.)
  - No symptom
  - Fever ( $\geq 37.5^{\circ}\text{C}$ )
  - Coughing
  - Muscle pain
  - Runny nose or stuffy nose
  - Sore throat
  - Dyspnea
  - Feebleness (Malaise)
  - Diarrhea
  - Abdominal pain
  - Others (\_\_\_\_\_)

13. Medication you had during 24 hours (Please check all the drugs you had)

- General medication for cold
- Fever remedy
- Antibiotics
- Medications for hypertension
- Medications for diabetes
- None
- Others (\_\_\_\_\_)

### Questionnaire for Daily Health Self-Monitoring

#### A. Gimje Center

1. Name: \_\_\_\_\_
2. Location
  - Building B
  - Building C
3. Room number: \_\_\_\_\_
4. Body temperature: \_\_\_\_\_ °C
5. Clinical symptoms (Please check all the symptoms you have.)
  - No symptom
  - Fever ( $\geq 37.5^{\circ}\text{C}$ )
  - Coughing
  - Muscle pain
  - Runny nose or stuffy nose
  - Sore throat
  - Dyspnea
  - Feebleness (Malaise)
  - Diarrhea
  - Abdominal pain
  - Others (\_\_\_\_\_)
6. Do you have severe symptoms that need doctor's consultation?
  - Yes
  - No
7. Other requests about medical support: \_\_\_\_\_

#### B. Gyeongju Center

1. Body temperature: \_\_\_\_\_ °C
2. Clinical symptoms (Please check all the symptoms you have.)
  - Coughing
  - Muscle pain
  - Runny nose or stuffy nose
  - Sore throat
  - Feebleness (Malaise)
  - Vomiting
  - Diarrhea
  - Abdominal pain
  - Others (\_\_\_\_\_)

C. Jecheon Center

1. Name: \_\_\_\_\_
2. Location
  - Building B
  - Building C
3. Room number: \_\_\_\_\_
4. Body temperature: \_\_\_\_\_ °C
5. Clinical symptoms (Please check all the symptoms you have.)
  - No symptom
  - Fever ( $\geq 37.5^{\circ}\text{C}$ )
  - Coughing
  - Muscle pain
  - Runny nose or stuffy nose
  - Sore throat
  - Dyspnea
  - Feebleness (Malaise)
  - Diarrhea
  - Abdominal pain
  - Other (\_\_\_\_\_)
6. Do you have severe symptoms that need doctor's consultation?
  - Yes
  - No
